# Supplementary material
Source: MDPI journal article supplement (https://www.mdpi.com/2073-4441/14/6/874)
Supplement: s1 [file s1]

Supplementary Material

# A Deliberative Rural Community Consultation to Assess Support for Flood Risk Management Policies to Strengthen Resilience in Malawi

## ANNEX 1: QUESTIONNAIRE IN ENGLISH

Gauging Citizens' Voice on Alternative Policies for Responding to Vulnerability Challenges Associated with Flooding in Nsanje District, Malawi.

### Read the following to the participant:

I will be asking questions to you on a 0 to 10 scale. Please respond to each question by saying a number from 0 to 10 or by showing all the fingers on your palm. For example, saying 0 means you think an issue is **extremely unimportant** and saying/showing 10 means it is **extremely important**. The number 5 is exactly in the middle. The higher the number you choose, the more importance you are giving the issue. And, if you don't know, you can just say don't know.

### Note for interviewer:

Further note: the highest rating, the level of 10 on the scale is only for the very most important priorities. If you were making a shopping list some items would go first as they would be most important-- you would be sure to buy those. Other items would go later as they would be less important, and you would buy those only if you had resources left. On the 0 to 10 scale below, please indicate how important or unimportant you think these options are. Feel free to use all the points on the scale, where 0 is not important at all, all the way up through 10, where 10 is for the most important items on your list, the very top priorities. Please give lower numbers for the items that are less important.

### Comments:

Code questionnaire | \_ | \_ | \_ | \_ |

Code Interviewer | \_ | \_ | \_ | \_ |

Telephone Number | \_ | \_ | \_ | \_ | \_ | \_ | \_ | \_ | \_ | \_ |

|                       |                       |                       |
|-----------------------|-----------------------|-----------------------|
| 1 <sup>st</sup> Visit | 2 <sup>nd</sup> Visit | 3 <sup>rd</sup> Visit |
|-----------------------|-----------------------|-----------------------|

|                                   |                                   |                                   |
|-----------------------------------|-----------------------------------|-----------------------------------|
| Date:<br> _ _ _ _ _ _ _ _ _       | Date:<br> _ _ _ _ _ _ _ _ _       | Date:<br> _ _ _ _ _ _ _ _ _       |
| Start time:<br> _ _ _  h _ _ _ mn | Start time:<br> _ _ _  h _ _ _ mn | Start time:<br> _ _ _  h _ _ _ mn |
| End time:<br> _ _ _  h _ _ _ mn   | End time:<br> _ _ _  h _ _ _ mn   | End time:<br> _ _ _  h _ _ _ mn   |

**Let's Begin!**

- To begin with, all in all, on a 0 to 10 scale, where 0 is no value at all, 10 is as much value as can be, and 5 is exactly in the middle, how much economic value does the Shire River provide you?

|                 |   |   |   |   |                       |   |   |   |   |                         |            |
|-----------------|---|---|---|---|-----------------------|---|---|---|---|-------------------------|------------|
| No value at all |   |   |   |   | Exactly in the middle |   |   |   |   | As much value as can be | Don't Know |
| 0               | 1 | 2 | 3 | 4 | 5                     | 6 | 7 | 8 | 9 | 10                      | 99         |

- And, on a 0 to 10 scale, where 0 is extremely risky, 10 is extremely safe, how much risk does the Shire River pose to you?

|                 |   |   |   |   |                       |   |   |   |   |                |            |
|-----------------|---|---|---|---|-----------------------|---|---|---|---|----------------|------------|
| Extremely risky |   |   |   |   | Exactly in the middle |   |   |   |   | Extremely safe | Don't Know |
| 0               | 1 | 2 | 3 | 4 | 5                     | 6 | 7 | 8 | 9 | 10             | 99         |

- On a scale from 0 to 10 where 0 is extremely unimportant, 10 is extremely important and 5 is exactly in the middle, how important or unimportant are the following for the **government to do**?

|  |           |  |  |  |         |  |  |  |  |           |       |
|--|-----------|--|--|--|---------|--|--|--|--|-----------|-------|
|  | Extremely |  |  |  | Exactly |  |  |  |  | Extremely | Don't |
|--|-----------|--|--|--|---------|--|--|--|--|-----------|-------|

|                                                                                                                                 | unimportant |   |   |   |   | in the middle |   |   |   |   | important | Know |
|---------------------------------------------------------------------------------------------------------------------------------|-------------|---|---|---|---|---------------|---|---|---|---|-----------|------|
|                                                                                                                                 | 0           | 1 | 2 | 3 | 4 | 5             | 6 | 7 | 8 | 9 | 10        | 99   |
| a. Facilitate the relocation of TA Nyachikadza community to suitable land in the high land area <b>within the same district</b> | 0           | 1 | 2 | 3 | 4 | 5             | 6 | 7 | 8 | 9 | 10        | 99   |
| b. Facilitate the relocation of TA Nyachikadza community to the best suitable land <b>anywhere in Malawi</b>                    | 0           | 1 | 2 | 3 | 4 | 5             | 6 | 7 | 8 | 9 | 10        | 99   |
| c. Should only proceed with resettlement after it has developed a plan that is approved by the TA Nyachikadza community         | 0           | 1 | 2 | 3 | 4 | 5             | 6 | 7 | 8 | 9 | 10        | 99   |
| d. Provide legal title to land for TA                                                                                           | 0           | 1 | 2 | 3 | 4 | 5             | 6 | 7 | 8 | 9 | 10        | 99   |

|                                                                                                                                   |   |   |   |   |   |   |   |   |   |   |    |  |    |
|-----------------------------------------------------------------------------------------------------------------------------------|---|---|---|---|---|---|---|---|---|---|----|--|----|
| Nyachikadza community members before relocation                                                                                   |   |   |   |   |   |   |   |   |   |   |    |  |    |
| e. Facilitate a complete relocation but allow communities to continue using their land for crop cultivation                       | 0 | 1 | 2 | 3 | 4 | 5 | 6 | 7 | 8 | 9 | 10 |  | 99 |
| f. Prohibit provision of any social service (hospitals, schools, etc.) in TA Nyachikadza as a way of 'forcing' people to relocate | 0 | 1 | 2 | 3 | 4 | 5 | 6 | 7 | 8 | 9 | 10 |  | 99 |
| g. Provide increased social services (e.g. schools, health centres) in TA Ndamera if people are relocated there                   | 0 | 1 | 2 | 3 | 4 | 5 | 6 | 7 | 8 | 9 | 10 |  | 99 |
| h. Facilitate TA Ndamera's                                                                                                        | 0 | 1 | 2 | 3 | 4 | 5 | 6 | 7 | 8 | 9 | 10 |  | 99 |

|                                                                                                                           |   |   |   |   |   |   |   |   |   |   |    |  |  |    |
|---------------------------------------------------------------------------------------------------------------------------|---|---|---|---|---|---|---|---|---|---|----|--|--|----|
| access to the low land for crop cultivation in exchange for hosting TA Nyachikadza's residence in the upland (TA Ndamera) |   |   |   |   |   |   |   |   |   |   |    |  |  |    |
| i. Facilitate increased agricultural production in TA Ndamera                                                             | 0 | 1 | 2 | 3 | 4 | 5 | 6 | 7 | 8 | 9 | 10 |  |  | 99 |

4. How important or unimportant would you rate the following factors in considering whether you will be willing to relocate?

|                                               | Extremely unimportant |   |   |   |   | Exactly in the middle |   |   |   |   | Extremely important |  | Don't Know |
|-----------------------------------------------|-----------------------|---|---|---|---|-----------------------|---|---|---|---|---------------------|--|------------|
| a. Quality of land where I would be relocated | 0                     | 1 | 2 | 3 | 4 | 5                     | 6 | 7 | 8 | 9 | 10                  |  | 99         |
| b. Leadership legitimacy in the new TA        | 0                     | 1 | 2 | 3 | 4 | 5                     | 6 | 7 | 8 | 9 | 10                  |  | 99         |
| c. Access to social ser-                      | 0                     | 1 | 2 | 3 | 4 | 5                     | 6 | 7 | 8 | 9 | 10                  |  | 99         |

|                                                                      |   |   |   |   |   |   |   |   |   |   |    |  |    |  |
|----------------------------------------------------------------------|---|---|---|---|---|---|---|---|---|---|----|--|----|--|
| vices like health and education                                      |   |   |   |   |   |   |   |   |   |   |    |  |    |  |
| d. Available livelihood sources                                      | 0 | 1 | 2 | 3 | 4 | 5 | 6 | 7 | 8 | 9 | 10 |  | 99 |  |
| e. Whether or not the whole community move together to the new place | 0 | 1 | 2 | 3 | 4 | 5 | 6 | 7 | 8 | 9 | 10 |  | 99 |  |
| f. Whether or not I will still have access to current ancestral land | 0 | 1 | 2 | 3 | 4 | 5 | 6 | 7 | 8 | 9 | 10 |  | 99 |  |
| g. Potential for conflict with people in the new area of relocation  | 0 | 1 | 2 | 3 | 4 | 5 | 6 | 7 | 8 | 9 | 10 |  | 99 |  |

5. And, on the same scale, the following are some questions about what the government should do regarding reducing vulnerability in the existing communities.

|  |                       |  |  |  |  |                       |  |  |  |  |                     |            |
|--|-----------------------|--|--|--|--|-----------------------|--|--|--|--|---------------------|------------|
|  | Extremely unimportant |  |  |  |  | Exactly in the middle |  |  |  |  | Extremely important | Don't Know |
|--|-----------------------|--|--|--|--|-----------------------|--|--|--|--|---------------------|------------|

|                                                                                                                                                                                                           |   |   |   |   |   |   |   |   |   |   |    |    |
|-----------------------------------------------------------------------------------------------------------------------------------------------------------------------------------------------------------|---|---|---|---|---|---|---|---|---|---|----|----|
| a. Construct a dyke along the Shire River from Nsanje District Centre to TA Nyachikadza (a distance of around 40 Km)                                                                                      | 0 | 1 | 2 | 3 | 4 | 5 | 6 | 7 | 8 | 9 | 10 | 99 |
| b. Construct a dyke along the Shire River from Nsanje District Centre to TA Nyachikadza <b>with labour from the communities</b> coordinated by the District Council as part of the Public Works Programme | 0 | 1 | 2 | 3 | 4 | 5 | 6 | 7 | 8 | 9 | 10 | 99 |
| c. Allow TA Nyachikadza communities to 'access' land upland to temporarily relocate during floods and return afterwards.                                                                                  | 0 | 1 | 2 | 3 | 4 | 5 | 6 | 7 | 8 | 9 | 10 | 99 |
| d. Allow communities to remain but develop an effective flood-early warning system.                                                                                                                       | 0 | 1 | 2 | 3 | 4 | 5 | 6 | 7 | 8 | 9 | 10 | 99 |
| e. Sensitize TA Nyachikadza communities on flood early warning.                                                                                                                                           | 0 | 1 | 2 | 3 | 4 | 5 | 6 | 7 | 8 | 9 | 10 | 99 |
| f. Develop places of safety for children and vulnerable groups (elderly, sick) when flood warnings are administered.                                                                                      | 0 | 1 | 2 | 3 | 4 | 5 | 6 | 7 | 8 | 9 | 10 | 99 |

|                                                                                                                                                                                                 |   |   |   |   |   |   |   |   |   |   |    |    |
|-------------------------------------------------------------------------------------------------------------------------------------------------------------------------------------------------|---|---|---|---|---|---|---|---|---|---|----|----|
| g. Put in place effective life-saving measures (such as petrol boats, life jackets, etc.) in all strategic places to be used to rescue people during floods                                     | 0 | 1 | 2 | 3 | 4 | 5 | 6 | 7 | 8 | 9 | 10 | 99 |
| h. Have the VCPC, ACPC and DCPC consider indigenous knowledge systems (IKS) in flood early warning.                                                                                             | 0 | 1 | 2 | 3 | 4 | 5 | 6 | 7 | 8 | 9 | 10 | 99 |
| i. Have all the Area Civil Protection Committees (ACPCs) and Village Civil Protection Committees (VCPCs) along the Shire River form an alliance to share information about flood early warning. | 0 | 1 | 2 | 3 | 4 | 5 | 6 | 7 | 8 | 9 | 10 | 99 |

6. How important or unimportant would you rate the effectiveness of the following methods of communications for early warning flood information?

|                                                     | Extremely ineffective |   |   |   |   | Exactly in the middle |   |   |   |   | Extremely effective | Don't Know |
|-----------------------------------------------------|-----------------------|---|---|---|---|-----------------------|---|---|---|---|---------------------|------------|
| a. Telephone voice                                  | 0                     | 1 | 2 | 3 | 4 | 5                     | 6 | 7 | 8 | 9 | 10                  | 99         |
| b. Telephone SMS                                    | 0                     | 1 | 2 | 3 | 4 | 5                     | 6 | 7 | 8 | 9 | 10                  | 99         |
| c. Beating drums                                    | 0                     | 1 | 2 | 3 | 4 | 5                     | 6 | 7 | 8 | 9 | 10                  | 99         |
| d. Whistles                                         | 0                     | 1 | 2 | 3 | 4 | 5                     | 6 | 7 | 8 | 9 | 10                  | 99         |
| e. Other Indigenous methods (e.g. animal migration) | 0                     | 1 | 2 | 3 | 4 | 5                     | 6 | 7 | 8 | 9 | 10                  | 99         |



7. On the same scale, the following are some questions about what the government should do regarding population pressure, gender and social services.

|                                                                                                                                         | Extremely un-<br>important |   |   |   |   | Exactly in the<br>middle |   |   |   |   | Extremely im-<br>portant | Don't<br>Know |
|-----------------------------------------------------------------------------------------------------------------------------------------|----------------------------|---|---|---|---|--------------------------|---|---|---|---|--------------------------|---------------|
| a. Provide wide access to free family planning services                                                                                 | 0                          | 1 | 2 | 3 | 4 | 5                        | 6 | 7 | 8 | 9 | 10                       | 99            |
| b. Construct a health centre in TA Nyachikadza so long as people live there                                                             | 0                          | 1 | 2 | 3 | 4 | 5                        | 6 | 7 | 8 | 9 | 10                       | 99            |
| c. Have families consider their land resources in deciding how many children to have                                                    | 0                          | 1 | 2 | 3 | 4 | 5                        | 6 | 7 | 8 | 9 | 10                       | 99            |
| d. Increase the use of temporary shelters for evacuation instead of classrooms                                                          | 0                          | 1 | 2 | 3 | 4 | 5                        | 6 | 7 | 8 | 9 | 10                       | 99            |
| e. Use community by-laws to restrict child marriages                                                                                    | 0                          | 1 | 2 | 3 | 4 | 5                        | 6 | 7 | 8 | 9 | 10                       | 99            |
| f. poor families with children of school-going age should only receive a cash transfer if they enroll their children to school          | 0                          | 1 | 2 | 3 | 4 | 5                        | 6 | 7 | 8 | 9 | 10                       | 99            |
| g. adults with children of school-going age should only participate in the Public Works Program if they enroll their children in school | 0                          | 1 | 2 | 3 | 4 | 5                        | 6 | 7 | 8 | 9 | 10                       | 99            |

|                                                                                                                     |   |   |   |   |   |   |   |   |   |   |    |    |
|---------------------------------------------------------------------------------------------------------------------|---|---|---|---|---|---|---|---|---|---|----|----|
| h. Establish collective storage facilities for food in the uplands (by the people from the lowlands)                | 0 | 1 | 2 | 3 | 4 | 5 | 6 | 7 | 8 | 9 | 10 | 99 |
| i. Provide adequate security in evacuation centres to ensure that women and girls are protected from abuse and rape | 0 | 1 | 2 | 3 | 4 | 5 | 6 | 7 | 8 | 9 | 10 | 99 |
| j. Allow families to be able to stay together during flood evacuations                                              | 0 | 1 | 2 | 3 | 4 | 5 | 6 | 7 | 8 | 9 | 10 | 99 |
| k. Allow households with persons who are vulnerable and sick be prioritized during flood evacuations                | 0 | 1 | 2 | 3 | 4 | 5 | 6 | 7 | 8 | 9 | 10 | 99 |
| l. Promote the capacity building of the VCPCs to know how to respond to emergencies                                 | 0 | 1 | 2 | 3 | 4 | 5 | 6 | 7 | 8 | 9 | 10 | 99 |
| m. Promote village savings and loans to provide alternative income sources for women                                | 0 | 1 | 2 | 3 | 4 | 5 | 6 | 7 | 8 | 9 | 10 | 99 |
| n. Ensure a woman should not lose the family land if her husband dies                                               | 0 | 1 | 2 | 3 | 4 | 5 | 6 | 7 | 8 | 9 | 10 | 99 |

8. On another 0 to 10 scale, where 0 strongly disagree and 10 is strongly agree, is **how strongly would you disagree or agree with the following statements?**

|                                                                                             | Strongly disagree |   |   |   |   | Exactly in the middle |   |   |   |   | Strongly agree | Don't Know |
|---------------------------------------------------------------------------------------------|-------------------|---|---|---|---|-----------------------|---|---|---|---|----------------|------------|
| a. Relocation is necessary for basic livelihood                                             | 0                 | 1 | 2 | 3 | 4 | 5                     | 6 | 7 | 8 | 9 | 10             | 99         |
| b. Current early warning notifications are ineffective                                      | 0                 | 1 | 2 | 3 | 4 | 5                     | 6 | 7 | 8 | 9 | 10             | 99         |
| c. Staying on one's traditional/ancestral land is worth the risk of being caught in a flood | 0                 | 1 | 2 | 3 | 4 | 5                     | 6 | 7 | 8 | 9 | 10             | 99         |
| d. Majority of people in our village do not want to relocate                                | 0                 | 1 | 2 | 3 | 4 | 5                     | 6 | 7 | 8 | 9 | 10             | 99         |
| e. I find it easy to move my family out to uplands even when the floods have started.       | 0                 | 1 | 2 | 3 | 4 | 5                     | 6 | 7 | 8 | 9 | 10             | 99         |
| f. In the event of a flood, I find government response is adequate.                         | 0                 | 1 | 2 | 3 | 4 | 5                     | 6 | 7 | 8 | 9 | 10             | 99         |

Now, we are back to questions on a 0 to 10 scale. Where 0 means not at all serious, 10 means completely serious and 5 is exactly in the middle.

9. How serious or not do you think the government will take into account your views and suggestions provided in this event?

| Not at all serious |   |   |   |   | Exactly in the middle |   |   |   |   | Completely serious | Don't Know |
|--------------------|---|---|---|---|-----------------------|---|---|---|---|--------------------|------------|
| 0                  | 1 | 2 | 3 | 4 | 5                     | 6 | 7 | 8 | 9 | 10                 | 99         |

10. And, where 0 is not at all confident, 10 is completely confident, and 5 is exactly in the middle, how confident are you **the government will use the results** from this event?

|                      |   |   |   |   |                       |   |   |   |   |    |                      |  |            |
|----------------------|---|---|---|---|-----------------------|---|---|---|---|----|----------------------|--|------------|
| Not at all confident |   |   |   |   | Exactly in the middle |   |   |   |   |    | Completely confident |  | Don't Know |
| 0                    | 1 | 2 | 3 | 4 | 5                     | 6 | 7 | 8 | 9 | 10 |                      |  | 99         |

11. And, where 0 is not at all confident, 10 is completely confident, and 5 is exactly in the middle, how confident are you **the community will use the results** from this event?

|                      |   |   |   |   |                       |   |   |   |   |    |                      |  |            |
|----------------------|---|---|---|---|-----------------------|---|---|---|---|----|----------------------|--|------------|
| Not at all confident |   |   |   |   | Exactly in the middle |   |   |   |   |    | Completely confident |  | Don't Know |
| 0                    | 1 | 2 | 3 | 4 | 5                     | 6 | 7 | 8 | 9 | 10 |                      |  | 99         |

12. And, how strongly would you agree or disagree with the following statements. Where 0 is strongly disagree, 10 is strongly agree and 5 is exactly in the middle.

|                                                                                          |                          |   |   |   |   |                              |   |   |   |   |    |                       |  |                   |
|------------------------------------------------------------------------------------------|--------------------------|---|---|---|---|------------------------------|---|---|---|---|----|-----------------------|--|-------------------|
|                                                                                          | <b>Strongly disagree</b> |   |   |   |   | <b>Exactly in the middle</b> |   |   |   |   |    | <b>Strongly agree</b> |  | <b>Don't Know</b> |
| a. People with different views from mine often have very good reasons for their opinions | 0                        | 1 | 2 | 3 | 4 | 5                            | 6 | 7 | 8 | 9 | 10 |                       |  | 99                |
| b. I consider myself capable of participating in politics                                | 0                        | 1 | 2 | 3 | 4 | 5                            | 6 | 7 | 8 | 9 | 10 |                       |  | 99                |

|                                                                                                               |   |   |   |   |   |   |   |   |   |   |    |    |
|---------------------------------------------------------------------------------------------------------------|---|---|---|---|---|---|---|---|---|---|----|----|
| c. Public officials care a lot about what people like me think                                                | 0 | 1 | 2 | 3 | 4 | 5 | 6 | 7 | 8 | 9 | 10 | 99 |
| d. Most public policy issues are so complicated that a person like me can't really understand what's going on | 0 | 1 | 2 | 3 | 4 | 5 | 6 | 7 | 8 | 9 | 10 | 99 |
| e. People like me don't have any say about what the government does                                           | 0 | 1 | 2 | 3 | 4 | 5 | 6 | 7 | 8 | 9 | 10 | 99 |

Now we are coming to some questions to which not everyone may know the answer. If you come to one to which you don't know the answer, just say so, and move on to the next one.

13. In which months are flood most likely to occur?

- a. November, December, January
- b. February, March, April
- c. May, June, July
- d. August, September, October
- e. Don't Know

14. Which of following types of livelihoods are more vulnerable to flooding?

- a. Crop production and livestock production

- b. Crop production and petty trading
- c. Crop production and semi-skilled work
- d. Crop production and casual labor
- e. Don't Know

15. Which of the following statement is correct?

- a. Females are permitted by law to get married after their first menstrual cycle.
- b. Females are permitted by law to get married when they reach 18 years of age.
- c. By law, females must be married by 18 years of age.
- d. Females are permitted by law to get married when marriage propose is made.
- e. Don't Know

16. On average, for Malawi, how many children does each family have?

- a. 3
- b. 6
- c. 9
- d. 12
- e. Don't Know

17. Which of the following statements is TRUE?

- a. When the Shire River floods into the Ndindi Marsh, the Nyachikadza community gets seriously affected.
- b. The Government of Malawi declared TA Nyachikadza as a flood-prone area and prohibited any individual from staying in the area.
- c. There is a high risk of increased spread of HIV during the relocations.
- d. When they temporarily relocate to Ndamera, there are always serious problems with WASH facilities, leading to outbreaks of cholera and other associated diseases, which affect members of both communities.
- e. All of the above.
- f. Don't Know

18. Now, there are some things that people find more or less important for themselves or society to have. On a 0 to 10 scale, where 0 is extremely unimportant, 10 is extremely important and 5 is exactly in the middle, how important or unimportant would you say each of the following is to you?

|                                                          | Extremely unimportant |   |   |   |   | Exactly in |   |   |   |   | Extremely important |  | Don't Know |
|----------------------------------------------------------|-----------------------|---|---|---|---|------------|---|---|---|---|---------------------|--|------------|
| a. Making one's own choices                              | 0                     | 1 | 2 | 3 | 4 | 5          | 6 | 7 | 8 | 9 | 10                  |  | 99         |
| b. Not having to worry about food or shelter             | 0                     | 1 | 2 | 3 | 4 | 5          | 6 | 7 | 8 | 9 | 10                  |  | 99         |
| c. Having a safe community                               | 0                     | 1 | 2 | 3 | 4 | 5          | 6 | 7 | 8 | 9 | 10                  |  | 99         |
| d. Making sure everybody has clean air and water         | 0                     | 1 | 2 | 3 | 4 | 5          | 6 | 7 | 8 | 9 | 10                  |  | 99         |
| e. Earn as much money as possible                        | 0                     | 1 | 2 | 3 | 4 | 5          | 6 | 7 | 8 | 9 | 10                  |  | 99         |
| f. Making sure that government does what the people want | 0                     | 1 | 2 | 3 | 4 | 5          | 6 | 7 | 8 | 9 | 10                  |  | 99         |
| g. Promoting economic growth                             | 0                     | 1 | 2 | 3 | 4 | 5          | 6 | 7 | 8 | 9 | 10                  |  | 99         |
| h. Having a well-educated society                        | 0                     | 1 | 2 | 3 | 4 | 5          | 6 | 7 | 8 | 9 | 10                  |  | 99         |

Finally, a few questions about you.

1. Have you received any training or education on disasters or flooding?
  - a. If so, what type of training, such as first aid?
2. Do you and/or your family have an alternative place to go to during times of a flood?

a. If so, where ?

3. Are you a member of the Village or Area Civil Protection Committee?

a. Name.....

b. Gender.....

c. Age |\_\_|\_\_|

d. Marital Status

a. Married

b. Single

c. Divorced

d. Widowed

e. Highest Level of Education

i. None

ii. Some primary school

iii. Primary school

iv. Some secondary school

v. Secondary school

vi. Some high school

vii. High school

viii. Some college

ix. College

x. Vocational School

g. Current Occupation:

1. Farmer

2. Professional/technical/managerial

3. Entrepreneur

4. Merchant

5. Teacher

6. Student

7. Other:

h. How many children do you have in your household? |\_\_|\_\_|



Do you have anyone in the household who is chronically ill? (Include list of diseases from previous questionnaire)

- i. What is your current household size? |\_\_|\_\_|
- j. How much land does your household own (lowland) in Acres?
- k. How much land does your household own (upland) in Acres?

Evaluation Questions (post-deliberation only)

Finally, some questions about the discussions you have engaged in over the past couple days.

On a scale of 0 to 10, where 0 is "a waste of time", 10 is "extremely valuable" and 5 is exactly in the middle, how valuable was each of the following in helping you clarify your positions on the issues?

- 1. The small group discussions

|                 |   |   |   |   |                       |   |   |   |   |    |                    |                               |
|-----------------|---|---|---|---|-----------------------|---|---|---|---|----|--------------------|-------------------------------|
| A waste of time |   |   |   |   | Exactly in the middle |   |   |   |   |    | Extremely valuable | Haven't thought much about it |
| 0               | 1 | 2 | 3 | 4 | 5                     | 6 | 7 | 8 | 9 | 10 | 99                 |                               |

- 2. The briefing materials

|            |  |  |  |  |                |  |  |  |  |  |           |                 |
|------------|--|--|--|--|----------------|--|--|--|--|--|-----------|-----------------|
| A waste of |  |  |  |  | Exactly in the |  |  |  |  |  | Extremely | Haven't thought |
|------------|--|--|--|--|----------------|--|--|--|--|--|-----------|-----------------|

|      |   |   |   |   |        |   |   |   |   |          |               |
|------|---|---|---|---|--------|---|---|---|---|----------|---------------|
| time |   |   |   |   | middle |   |   |   |   | valuable | much about it |
| 0    | 1 | 2 | 3 | 4 | 5      | 6 | 7 | 8 | 9 | 10       | 99            |

3. The plenary session

|                 |   |   |   |   |                       |   |   |   |   |                    |                               |
|-----------------|---|---|---|---|-----------------------|---|---|---|---|--------------------|-------------------------------|
| A waste of time |   |   |   |   | Exactly in the middle |   |   |   |   | Extremely valuable | Haven't thought much about it |
| 0               | 1 | 2 | 3 | 4 | 5                     | 6 | 7 | 8 | 9 | 10                 | 99                            |

4. The event as a whole

|                 |   |   |   |   |                       |   |   |   |   |                    |                               |
|-----------------|---|---|---|---|-----------------------|---|---|---|---|--------------------|-------------------------------|
| A waste of time |   |   |   |   | Exactly in the middle |   |   |   |   | Extremely valuable | Haven't thought much about it |
| 0               | 1 | 2 | 3 | 4 | 5                     | 6 | 7 | 8 | 9 | 10                 | 99                            |

And how strongly would you agree or disagree with each of the following statements?

|                                                                                              |                   |                   |                            |                |                |
|----------------------------------------------------------------------------------------------|-------------------|-------------------|----------------------------|----------------|----------------|
|                                                                                              | Disagree Strongly | Disagree Somewhat | Neither agree nor disagree | Agree Somewhat | Strongly Agree |
| 5. My group moderator provided the opportunity for everyone to participate in the discussion | 1                 | 2                 | 3                          | 4              | 5              |

---

|                                                                                                    |   |   |   |   |   |
|----------------------------------------------------------------------------------------------------|---|---|---|---|---|
|                                                                                                    |   |   |   |   |   |
| 6. The members of my group participated relatively equally in the discussions                      | 1 | 2 | 3 | 4 | 5 |
| 7. My group moderator sometimes tried to influence the group with his or her own views             | 1 | 2 | 3 | 4 | 5 |
| 8. My group moderator tried to make sure that opposing arguments were considered                   | 1 | 2 | 3 | 4 | 5 |
| 9. The important aspects of the issues were covered in the group discussions                       | 1 | 2 | 3 | 4 | 5 |
| 10. I learned a lot about people very different from me - about what they and their lives are like | 1 | 2 | 3 | 4 | 5 |
